# Supplementary material for: Photocatalysis-induced selective decoration of semiconducting single walled carbon nanotubes: hole-doping effect
Source: Royal Society of Chemistry journal article supplement (doi:10.1039/c0cc01876g), 2010-01-01
Supplement: c0cc01876g.pdf [file c0cc01876g.pdf]

Supporting Information

## Photocatalysis-induced Selective Decoration of Semiconducting Single Walled Carbon Nanotubes: Hole-doping Effect

Satoshi Kubota,<sup>a</sup> Daisuke Shimamoto,<sup>b</sup> Jin Sung Park,<sup>b</sup> Hiromasa Nishikiori,<sup>a</sup> Nobuaki Tanaka,<sup>a</sup> Yoong Ahm Kim,<sup>a</sup> Tsuneo Fujii,<sup>a,c</sup> Morinobu Endo<sup>a,b</sup> and Milred S. Dresselhaus<sup>d</sup>

<sup>a</sup>Faculty of Engineering, Shinshu University, Wakasato, Nagano 380-8553, E-mail: yak@endomoribu.shinshu-u.ac.jp; Fax: +81-26-269-5208; Tel: +81-26-269-5212;

<sup>b</sup>Institute of Carbon Science & Technology, Shinshu University, 4-17-1 Wakasato, Nagano 380-8553 (Japan)

<sup>c</sup>Nagano Prefectural Institute of Technology, Shimonogou, Ueda, Nagano 386-1211, Japan

<sup>d</sup>Massachusetts Institute of Technology Cambridge, Massachusetts 02139-4307, USA

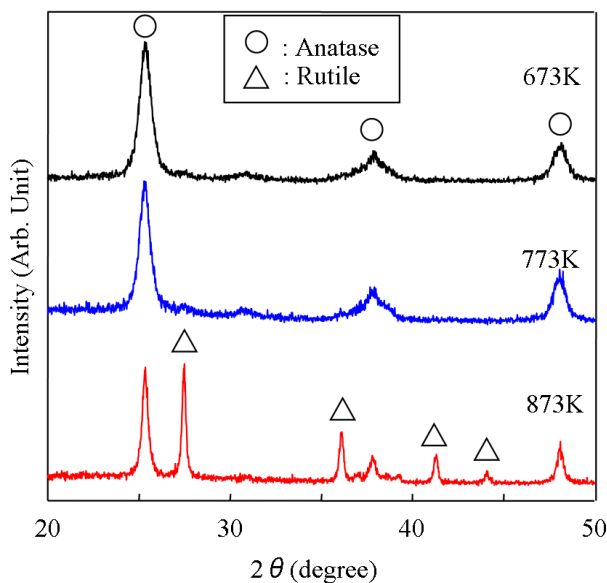

Figure S1. X-ray diffraction patterns of TiO<sub>2</sub> films that are prepared at different thermal treatment temperatures
